# Supplementary material
Source: MDPI journal article supplement (https://www.mdpi.com/2813-3757/1/4/16)
Supplement: s1 [file s1]

## Supplementary Tables

Supplementary Table S1: Interface parameters C-subunit and IP20 peptide (PDB ID: 1ATP)

|                            | Catalytic Subunit |         | IP20 peptide |         |
|----------------------------|-------------------|---------|--------------|---------|
| <b>Number of atoms</b>     |                   |         |              |         |
| <b>interface</b>           | 126               | 4.50%   | 92           | 58.60%  |
| <b>surface</b>             | 1502              | 54.10%  | 138          | 87.90%  |
| <b>total</b>               | 2777              | 100.00% | 157          | 100.00% |
| Number of residues         |                   |         |              |         |
| <b>interface</b>           | 40                | 11.90%  | 17           | 85.00%  |
| <b>surface</b>             | 317               | 94.30%  | 20           | 100.00% |
| <b>total</b>               | 336               | 100.00% | 20           | 100.00% |
| Solvent-accessible area, Å |                   |         |              |         |
| <b>interface</b>           | 963.7             | 6.30%   | 1143.5       | 47.90%  |
| <b>total</b>               | 15344.9           | 100.00% | 2388.6       | 100.00% |
| Solvation energy, kcal/mol |                   |         |              |         |
| <b>isolated structure</b>  | -328.7            | 100.00% | -7.8         | 100.00% |
| gain on complex formation  | -3.1              | 1.00%   | -2.2         | 28.70%  |
| average gain               | -2.6              | 0.80%   | -2.8         | 35.80%  |
| <b>P-value</b>             | 0.451             |         | 0.537        |         |

### 1.1 Hydrogen bond profile for C-subunit and IP20 peptide (PDB ID: 1ATP)

| ## | Catalytic Subunit | IP20 peptide   | H-bond distance |
|----|-------------------|----------------|-----------------|
| 1  | E:ASP 241[ OD1]   | I:GLY 14[ N ]  | 2.82            |
| 2  | E:GLU 203[ OE2]   | I:ARG 15[ NH1] | 2.70            |
| 3  | E:GLU 127[ OE2]   | I:ARG 18[ NE ] | 2.82            |
| 4  | E:THR 51[ O ]     | I:ARG 18[ NH1] | 3.14            |
| 5  | E:GLU 127[ OE2]   | I:ARG 18[ NH2] | 2.94            |
| 6  | E:THR 51[ O ]     | I:ARG 18[ NH2] | 2.93            |
| 7  | E:GLU 170[ OE2]   | I:ARG 19[ N ]  | 2.52            |
| 8  | E:GLU 170[ OE2]   | I:ARG 19[ NE ] | 2.78            |
| 9  | E:GLU 230[ OE1]   | I:ARG 19[ NH1] | 3.46            |
| 10 | E:GLU 230[ OE2]   | I:ARG 19[ NH1] | 3.31            |
| 11 | E:GLU 230[ OE1]   | I:ARG 19[ NH2] | 3.46            |
| 12 | E:GLU 230[ OE2]   | I:ARG 19[ NH2] | 3.42            |
| 13 | E:GLU 170[ OE1]   | I:ARG 19[ NH2] | 2.96            |
| 14 | E:SER 53[ OG ]    | I:ALA 21[ N ]  | 3.48            |
| 15 | E:GLY 200[ O ]    | I:ILE 22[ N ]  | 2.80            |
| 16 | E:ARG 133[ NH1]   | I:THR 16[ O ]  | 3.09            |
| 17 | E:SER 53[ OG ]    | I:ALA 21[ O ]  | 2.77            |

### 1.2 Salt Bridge profile for C-subunit and IP20 peptide (PDB ID: 1ATP)

| ## | Catalytic Subunit | IP20 peptide   | Dist. [Å] |
|----|-------------------|----------------|-----------|
| 1  | E:GLU 203[ OE2]   | I:ARG 15[ NE ] | 3.59      |
| 2  | E:GLU 203[ OE1]   | I:ARG 15[ NH1] | 2.95      |

|    |                 |                |      |
|----|-----------------|----------------|------|
| 3  | E:GLU 203[ OE2] | I:ARG 15[ NH1] | 2.70 |
| 4  | E:GLU 127[ OE1] | I:ARG 18[ NE ] | 3.37 |
| 5  | E:GLU 127[ OE2] | I:ARG 18[ NE ] | 2.82 |
| 6  | E:GLU 127[ OE2] | I:ARG 18[ NH2] | 2.94 |
| 7  | E:GLU 170[ OE1] | I:ARG 19[ NE ] | 3.54 |
| 8  | E:GLU 170[ OE2] | I:ARG 19[ NE ] | 2.78 |
| 9  | E:GLU 230[ OE1] | I:ARG 19[ NH1] | 3.46 |
| 10 | E:GLU 230[ OE2] | I:ARG 19[ NH1] | 3.31 |
| 11 | E:GLU 230[ OE1] | I:ARG 19[ NH2] | 3.46 |
| 12 | E:GLU 230[ OE2] | I:ARG 19[ NH2] | 3.42 |
| 13 | E:GLU 170[ OE1] | I:ARG 19[ NH2] | 2.96 |
| 14 | E:GLU 170[ OE2] | I:ARG 19[ NH2] | 3.62 |
| 15 | E:LYS 83[ NZ ]  | I:ASP 24[ OD1] | 3.22 |
| 16 | E:LYS 83[ NZ ]  | I:ASP 24[ OD2] | 3.64 |

Supplementary Table S2: Interface parameters C-subunit and CNBA(73-244)of RIA (PDB ID: 3PVB)

|                            | Catalytic Subunit |         | CNBA RIA |         |
|----------------------------|-------------------|---------|----------|---------|
| <b>Number of atoms</b>     |                   |         |          |         |
| <b>interface</b>           | 171               | 6.20%   | 151      | 12.40%  |
| <b>surface</b>             | 1515              | 54.60%  | 773      | 63.50%  |
| <b>total</b>               | 2774              | 100.00% | 1218     | 100.00% |
| Number of residues         |                   |         |          |         |
| <b>interface</b>           | 49                | 14.20%  | 36       | 22.50%  |
| <b>surface</b>             | 324               | 93.90%  | 154      | 96.20%  |
| <b>total</b>               | 345               | 100.00% | 160      | 100.00% |
| Solvent-accessible area, Å |                   |         |          |         |
| <b>interface</b>           | 1510              | 9.60%   | 1592     | 16.10%  |
| <b>total</b>               | 15773.1           | 100.00% | 9906.3   | 100.00% |
| Solvation energy, kcal/mol |                   |         |          |         |
| <b>isolated structure</b>  | -317.4            | 100.00% | -123.4   | 100.00% |
| gain on complex formation  | -8.3              | 2.60%   | -3.6     | 2.90%   |
| average gain               | -5.5              | 1.70%   | -5.1     | 4.10%   |
| <b>P-value</b>             | 0.273             |         | 0.621    |         |

2.1 Hydrogen bond profile for C-subunit and CNBA(73-244)of RIA (PDB ID: 3PVB)

| ## | Catalytic Subunit | CNBA RIA       | Dist. [Å] |
|----|-------------------|----------------|-----------|
| 1  | A:GLU 203[ OE2]   | B:ARG 92[ NH1] | 3.49      |
| 2  | A:GLU 230[ OE2]   | B:ARG 92[ NH2] | 2.47      |
| 3  | A:GLY 234[ O ]    | B:ARG 92[ NH2] | 3.36      |
| 4  | A:GLU 127[ OE1]   | B:ARG 94[ NH1] | 2.49      |
| 5  | A:THR 51[ O ]     | B:ARG 94[ NH2] | 2.46      |
| 6  | A:GLU 170[ OE2]   | B:ARG 95[ N ]  | 3.22      |
| 7  | A:GLU 170[ OE2]   | B:ARG 95[ NE ] | 2.49      |
| 8  | A:GLU 230[ OE1]   | B:ARG 95[ NH1] | 3.38      |
| 9  | A:GLU 230[ OE2]   | B:ARG 95[ NH1] | 3.14      |

|    |                 |                 |      |
|----|-----------------|-----------------|------|
| 10 | A:GLU 203[ OE2] | B:ARG 95[ NH1]  | 3.76 |
| 11 | A:GLU 170[ OE1] | B:ARG 95[ NH2]  | 3.42 |
| 12 | A:GLU 230[ OE1] | B:ARG 95[ NH2]  | 3.20 |
| 13 | A:GLU 230[ OE2] | B:ARG 95[ NH2]  | 3.05 |
| 14 | A:SER 53[ OG ]  | B:ALA 97[ N ]   | 2.74 |
| 15 | A:GLY 200[ O ]  | B:ILE 98[ N ]   | 2.44 |
| 16 | A:LEU 198[ O ]  | B:SER 99[ OG ]  | 3.31 |
| 17 | A:LEU 198[ O ]  | B:ALA 100[ N ]  | 2.98 |
| 18 | A:TYR 247[ OH ] | B:TYR 205[ OH ] | 2.63 |
| 19 | A:SER 212[ OG ] | B:TYR 229[ OH ] | 3.79 |
| 20 | A:TRP 196[ O ]  | B:ARG 230[ NH1] | 2.45 |
| 21 | A:LYS 168[ NZ ] | B:ARG 95[ O ]   | 2.91 |
| 22 | A:SER 53[ OG ]  | B:ALA 97[ O ]   | 2.70 |
| 23 | A:GLY 200[ N ]  | B:ILE 98[ O ]   | 2.54 |
| 24 | A:GLN 84[ NE2]  | B:SER 99[ O ]   | 3.52 |
| 25 | A:LYS 213[ NZ ] | B:HIS 138[ O ]  | 3.22 |

## 2.2 Salt Bridge profile for C-subunit and CNBA(73-244)of RIA (PDB ID: 3PVB)

| ## | Catalytic Subunit | CNBA RIA       | Dist. [Å] |
|----|-------------------|----------------|-----------|
| 1  | A:GLU 230[ OE2]   | B:ARG 92[ NH1] | 3.25      |
| 2  | A:GLU 203[ OE2]   | B:ARG 92[ NH1] | 3.49      |
| 3  | A:GLU 230[ OE2]   | B:ARG 92[ NH2] | 2.47      |
| 4  | A:GLU 127[ OE2]   | B:ARG 94[ NE ] | 3.99      |
| 5  | A:GLU 127[ OE1]   | B:ARG 94[ NH1] | 2.49      |
| 6  | A:GLU 127[ OE2]   | B:ARG 94[ NH1] | 2.96      |
| 7  | A:GLU 170[ OE1]   | B:ARG 95[ NE ] | 3.91      |
| 8  | A:GLU 170[ OE2]   | B:ARG 95[ NE ] | 2.49      |
| 9  | A:GLU 203[ OE2]   | B:ARG 95[ NE ] | 3.98      |
| 10 | A:GLU 230[ OE1]   | B:ARG 95[ NH1] | 3.38      |
| 11 | A:GLU 230[ OE2]   | B:ARG 95[ NH1] | 3.14      |
| 12 | A:GLU 203[ OE2]   | B:ARG 95[ NH1] | 3.76      |
| 13 | A:GLU 170[ OE1]   | B:ARG 95[ NH2] | 3.42      |
| 14 | A:GLU 170[ OE2]   | B:ARG 95[ NH2] | 3.37      |
| 15 | A:GLU 230[ OE1]   | B:ARG 95[ NH2] | 3.20      |
| 16 | A:GLU 230[ OE2]   | B:ARG 95[ NH2] | 3.05      |

## Supplementary Table S3: Interface parameters C-subunit and CNBA(102-265)of RIIB (PDB ID: 3IDC)

|                           | Catalytic Subunit |         | CNBA RIB |         |
|---------------------------|-------------------|---------|----------|---------|
| <b>Number of atoms</b>    |                   |         |          |         |
| <b>interface</b>          | 175               | 6.40%   | 148      | 13.00%  |
| <b>surface</b>            | 1527              | 55.80%  | 815      | 71.70%  |
| <b>total</b>              | 2736              | 100.00% | 1136     | 100.00% |
| <b>Number of residues</b> |                   |         |          |         |
| <b>interface</b>          | 51                | 14.90%  | 35       | 21.90%  |

|                            |         |         |         |         |
|----------------------------|---------|---------|---------|---------|
| <b>surface</b>             | 321     | 93.60%  | 159     | 99.40%  |
| <b>total</b>               | 343     | 100.00% | 160     | 100.00% |
| Solvent-accessible area, Å |         |         |         |         |
| <b>interface</b>           | 1430.4  | 9.30%   | 1653.3  | 15.80%  |
| <b>total</b>               | 15433.5 | 100.00% | 10473.8 | 100.00% |
| Solvation energy, kcal/mol |         |         |         |         |
| <b>isolated structure</b>  | -316    | 100.00% | -69.4   | 100.00% |
| gain on complex formation  | -9.4    | 3.00%   | -9.8    | 14.10%  |
| average gain               | -4.2    | 1.30%   | -9.7    | 14.00%  |
| <b>P-value</b>             | 0.096   |         | 0.491   |         |

### 3.1 Hydrogen bond profile for C-subunit and CNBA(102-265)of RIIB (PDB ID: 3IDC)

| ## | Catalytic Subunit | CNBA RIIB       | Dist. [Å] |
|----|-------------------|-----------------|-----------|
| 1  | A:ASP 241[ OD2]   | B:ARG 106[ NH1] | 2.69      |
| 2  | A:GLU 127[ OE2]   | B:ARG 109[ NE ] | 2.63      |
| 3  | A:GLU 127[ OE2]   | B:ARG 109[ NH2] | 2.54      |
| 4  | A:GLU 170[ OE1]   | B:ARG 110[ N ]  | 2.89      |
| 5  | A:GLU 170[ OE1]   | B:ARG 110[ NE ] | 2.71      |
| 6  | A:GLU 230[ OE1]   | B:ARG 110[ NH1] | 2.89      |
| 7  | A:GLU 230[ OE2]   | B:ARG 110[ NH2] | 3.20      |
| 8  | A:GLU 170[ OE2]   | B:ARG 110[ NH2] | 2.96      |
| 9  | A:GLY 200[ O ]    | B:VAL 113[ N ]  | 2.70      |
| 10 | A:LEU 198[ O ]    | B:ALA 115[ N ]  | 2.94      |
| 11 | A:TPO 197[ O3P]   | B:TYR 118[ N ]  | 3.79      |
| 12 | A:TPO 197[ OG1]   | B:TYR 118[ N ]  | 3.88      |
| 13 | A:TYR 247[ OH ]   | B:TYR 226[ OH ] | 3.21      |
| 14 | A:SER 212[ O ]    | B:ASN 258[ ND2] | 3.27      |
| 15 | A:LYS 168[ NZ ]   | B:ARG 110[ O ]  | 3.75      |
| 16 | A:THR 201[ OG1]   | B:ALA 111[ O ]  | 3.47      |
| 17 | A:GLY 200[ N ]    | B:VAL 113[ O ]  | 2.94      |
| 18 | A:ARG 194[ NH1]   | B:ALA 259[ O ]  | 3.17      |

### 3.2 Salt Bridge profile for C-subunit and CNBA(102-265)of RIIB (PDB ID: 3IDC)

| ## | Catalytic Subunit | CNBA RIIB       | Dist. [Å] |
|----|-------------------|-----------------|-----------|
| 1  | A:ASP 241[ OD1]   | B:ARG 106[ NE ] | 3.73      |
| 2  | A:ASP 241[ OD1]   | B:ARG 106[ NH1] | 3.41      |
| 3  | A:ASP 241[ OD2]   | B:ARG 106[ NH1] | 2.69      |
| 4  | A:ASP 241[ OD1]   | B:ARG 106[ NH2] | 3.93      |
| 5  | A:ASP 241[ OD2]   | B:ARG 106[ NH2] | 3.27      |
| 6  | A:GLU 127[ OE1]   | B:ARG 109[ NE ] | 2.87      |
| 7  | A:GLU 127[ OE2]   | B:ARG 109[ NE ] | 2.63      |
| 8  | A:GLU 127[ OE2]   | B:ARG 109[ NH2] | 2.54      |
| 9  | A:GLU 170[ OE2]   | B:ARG 110[ NE ] | 3.81      |

|           |                 |                 |      |
|-----------|-----------------|-----------------|------|
| <b>10</b> | A:GLU 170[ OE1] | B:ARG 110[ NE ] | 2.71 |
| <b>11</b> | A:GLU 230[ OE2] | B:ARG 110[ NH1] | 3.59 |
| <b>12</b> | A:GLU 230[ OE1] | B:ARG 110[ NH1] | 2.89 |
| <b>13</b> | A:GLU 230[ OE2] | B:ARG 110[ NH2] | 3.20 |
| <b>14</b> | A:GLU 230[ OE1] | B:ARG 110[ NH2] | 3.21 |
| <b>15</b> | A:GLU 170[ OE2] | B:ARG 110[ NH2] | 2.96 |
| <b>16</b> | A:GLU 170[ OE1] | B:ARG 110[ NH2] | 3.31 |

Supplementary Table S4: Interface parameters C-subunit and CNBA + CNBB (91-379) of RIA (PDB ID: 4X6R)

|                            | Catalytic Subunit |         | CNBA + CNBB RIA |         |
|----------------------------|-------------------|---------|-----------------|---------|
| <b>Number of atoms</b>     |                   |         |                 |         |
| <b>interface</b>           | 220               | 7.70%   | 203             | 8.80%   |
| <b>surface</b>             | 1573              | 55.20%  | 1419            | 61.90%  |
| <b>total</b>               | 2851              | 100.00% | 2294            | 100.00% |
| Number of residues         |                   |         |                 |         |
| <b>interface</b>           | 60                | 17.10%  | 51              | 17.60%  |
| <b>surface</b>             | 323               | 92.30%  | 283             | 97.60%  |
| <b>total</b>               | 350               | 100.00% | 290             | 100.00% |
| Solvent-accessible area, Å |                   |         |                 |         |
| <b>interface</b>           | 1959.8            | 11.80%  | 2043.8          | 11.90%  |
| <b>total</b>               | 16633.2           | 100.00% | 17129.8         | 100.00% |
| Solvation energy, kcal/mol |                   |         |                 |         |
| <b>isolated structure</b>  | -338.6            | 100.00% | -259.4          | 100.00% |
| gain on complex formation  | -8.9              | 2.60%   | -0.5            | 0.20%   |
| average gain               | -3.7              | 1.10%   | -2.7            | 1.00%   |
| <b>P-value</b>             | 0.136             |         | 0.656           |         |

#### 4.1 Hydrogen bond profile for C-subunit and CNBA + CNBB (91-379) of RIA (PDB ID: 4X6R)

| <b>##</b> | <b>Catalytic Subunit</b> | <b>CNBA + CNBB RIA</b> | <b>Dist. [Å]</b> |
|-----------|--------------------------|------------------------|------------------|
| <b>1</b>  | A:ASP 328[ OD1]          | B:ARG 92[ NH1]         | 2.94             |
| <b>2</b>  | A:ASP 328[ OD2]          | B:ARG 92[ NH1]         | 2.95             |
| <b>3</b>  | A:ASP 328[ OD1]          | B:ARG 92[ NH2]         | 2.81             |
| <b>4</b>  | A:GLU 203[ OE2]          | B:ARG 93[ NH1]         | 3.50             |
| <b>5</b>  | A:GLU 127[ OE2]          | B:ARG 94[ NE ]         | 3.22             |
| <b>6</b>  | A:GLU 127[ OE1]          | B:ARG 94[ NE ]         | 2.93             |
| <b>7</b>  | A:THR 51[ O ]            | B:ARG 94[ NH1]         | 3.28             |
| <b>8</b>  | A:THR 51[ OG1]           | B:ARG 94[ NH1]         | 3.77             |
| <b>9</b>  | A:GLU 127[ OE1]          | B:ARG 94[ NH2]         | 2.88             |
| <b>10</b> | A:THR 51[ O ]            | B:ARG 94[ NH2]         | 3.27             |
| <b>11</b> | A:GLU 170[ OE2]          | B:ARG 95[ N ]          | 2.87             |
| <b>12</b> | A:GLU 170[ OE2]          | B:ARG 95[ NE ]         | 2.74             |
| <b>13</b> | A:GLU 230[ OE1]          | B:ARG 95[ NH1]         | 3.02             |
| <b>14</b> | A:GLU 230[ OE2]          | B:ARG 95[ NH1]         | 2.98             |
| <b>15</b> | A:GLU 230[ OE2]          | B:ARG 95[ NH2]         | 3.12             |
| <b>16</b> | A:GLU 170[ OE1]          | B:ARG 95[ NH2]         | 2.88             |

|    |                 |                 |      |
|----|-----------------|-----------------|------|
| 17 | A:SER 53[ OG ]  | B:ALA 97[ N ]   | 3.47 |
| 18 | A:GLY 200[ O ]  | B:ILE 98[ N ]   | 2.79 |
| 19 | A:LEU 198[ O ]  | B:SER 99[ OG ]  | 3.85 |
| 20 | A:LEU 198[ O ]  | B:ALA 100[ N ]  | 2.86 |
| 21 | A:TYR 247[ OH ] | B:TYR 205[ OH ] | 2.77 |
| 22 | A:TRP 196[ O ]  | B:ARG 230[ NH1] | 2.74 |
| 23 | A:LYS 213[ O ]  | B:ARG 241[ NH2] | 3.20 |
| 24 | A:ASP 276[ OD1] | B:ARG 352[ NH1] | 2.90 |
| 25 | A:ASP 276[ OD2] | B:ARG 352[ NH2] | 3.67 |
| 26 | A:THR 278[ O ]  | B:ARG 355[ NE ] | 2.86 |
| 27 | A:THR 278[ OG1] | B:ARG 355[ NH2] | 2.93 |
| 28 | A:LYS 168[ NZ ] | B:ARG 95[ O ]   | 2.91 |
| 29 | A:SER 53[ OG ]  | B:ALA 97[ O ]   | 2.91 |
| 30 | A:GLY 200[ N ]  | B:ILE 98[ O ]   | 3.02 |
| 31 | A:LYS 213[ NZ ] | B:HIS 138[ O ]  | 3.35 |
| 32 | A:LYS 213[ NZ ] | B:GLU 143[ OE1] | 2.99 |
| 33 | A:ARG 194[ NH2] | B:ASP 267[ OD2] | 2.48 |
| 34 | A:LYS 285[ N ]  | B:ARG 355[ O ]  | 2.96 |

#### 4.2 Salt Bridge profile for C-subunit and CNBA + CNBB (91-379) of RIA (PDB ID: 4X6R)

| ## | Catalytic Subunit | CNBA + CNBB<br>RIA | Dist. [Å] |
|----|-------------------|--------------------|-----------|
| 1  | A:ASP 328[ OD1]   | B:ARG 92[ NH1]     | 2.94      |
| 2  | A:ASP 328[ OD2]   | B:ARG 92[ NH1]     | 2.95      |
| 3  | A:ASP 328[ OD1]   | B:ARG 92[ NH2]     | 2.81      |
| 4  | A:GLU 203[ OE2]   | B:ARG 93[ NH1]     | 3.50      |
| 5  | A:GLU 127[ OE2]   | B:ARG 94[ NE ]     | 3.22      |
| 6  | A:GLU 127[ OE1]   | B:ARG 94[ NE ]     | 2.93      |
| 7  | A:GLU 127[ OE1]   | B:ARG 94[ NH2]     | 2.88      |
| 8  | A:GLU 170[ OE1]   | B:ARG 95[ NE ]     | 3.61      |
| 9  | A:GLU 170[ OE2]   | B:ARG 95[ NE ]     | 2.74      |
| 10 | A:GLU 230[ OE1]   | B:ARG 95[ NH1]     | 3.02      |
| 11 | A:GLU 230[ OE2]   | B:ARG 95[ NH1]     | 2.98      |
| 12 | A:GLU 230[ OE1]   | B:ARG 95[ NH2]     | 3.33      |
| 13 | A:GLU 230[ OE2]   | B:ARG 95[ NH2]     | 3.12      |
| 14 | A:GLU 170[ OE1]   | B:ARG 95[ NH2]     | 2.88      |
| 15 | A:GLU 170[ OE2]   | B:ARG 95[ NH2]     | 3.46      |
| 16 | A:ASP 276[ OD1]   | B:ARG 352[ NH1]    | 2.90      |
| 17 | A:ASP 276[ OD2]   | B:ARG 352[ NH1]    | 3.77      |
| 18 | A:ASP 276[ OD1]   | B:ARG 352[ NH2]    | 3.74      |
| 19 | A:ASP 276[ OD2]   | B:ARG 352[ NH2]    | 3.67      |
| 20 | A:LYS 83[ NZ ]    | B:GLU 101[ OE2]    | 3.56      |
| 21 | A:LYS 213[ NZ ]   | B:GLU 143[ OE1]    | 2.99      |
| 22 | A:LYS 213[ NZ ]   | B:GLU 143[ OE2]    | 3.80      |
| 23 | A:ARG 194[ NE ]   | B:ASP 267[ OD2]    | 2.91      |
| 24 | A:ARG 194[ NH2]   | B:ASP 267[ OD2]    | 2.48      |

Supplementary Table S5: Interface parameters C-subunit and CNBA + CNBB (108-416) of RIIB (PDB ID: 4X6Q)

|                            | Catalytic Subunit |         | CNBA + CNBB RIIB |         |
|----------------------------|-------------------|---------|------------------|---------|
| <b>Number of atoms</b>     |                   |         |                  |         |
| <b>interface</b>           | 212               | 7.60%   | 182              | 8.50%   |
| <b>surface</b>             | 1551              | 55.70%  | 1295             | 60.70%  |
| <b>total</b>               | 2787              | 100.00% | 2132             | 100.00% |
| Number of residues         |                   |         |                  |         |
| <b>interface</b>           | 59                | 17.50%  | 47               | 17.40%  |
| <b>surface</b>             | 315               | 93.50%  | 259              | 95.90%  |
| <b>total</b>               | 337               | 100.00% | 270              | 100.00% |
| Solvent-accessible area, Å |                   |         |                  |         |
| <b>interface</b>           | 1885.6            | 11.40%  | 2042.9           | 12.50%  |
| <b>total</b>               | 16490.8           | 100.00% | 16317.5          | 100.00% |
| Solvation energy, kcal/mol |                   |         |                  |         |
| <b>isolated structure</b>  | -335.7            | 100.00% | -227.8           | 100.00% |
| gain on complex formation  | -8.9              | 2.70%   | -5.5             | 2.40%   |
| average gain               | -3                | 0.90%   | -4.9             | 2.20%   |
| <b>P-value</b>             | 0.105             |         | 0.464            |         |

## 5.1 Hydrogen bond profile for C-subunit and CNBA + CNBB (108-416) of RIIB (PDB ID: 4X6Q)

| ## | Catalytic Subunit | CNBA + CNBB RIIB | Dist. [Å] |
|----|-------------------|------------------|-----------|
| 1  | C:ARG 133[ NE ]   | B:ARG 106[ O ]   | 2.87      |
| 2  | C:LYS 168[ NZ ]   | B:ARG 110[ O ]   | 2.98      |
| 3  | C:SER 53[ OG ]    | B:SER 112[ O ]   | 3.12      |
| 4  | C:LYS 168[ NZ ]   | B:SER 112[ OG ]  | 3.00      |
| 5  | C:THR 201[ OG1]   | B:SER 112[ OG ]  | 3.90      |
| 6  | C:GLY 200[ N ]    | B:VAL 113[ O ]   | 3.30      |
| 7  | C:TYR 247[ OH ]   | B:TYR 226[ OH ]  | 2.65      |
| 8  | C:ARG 194[ NE ]   | B:ASP 288[ OD1]  | 3.12      |
| 9  | C:ARG 194[ NH1]   | B:ASP 288[ OD2]  | 2.48      |
| 10 | C:LYS 285[ N ]    | B:ARG 381[ O ]   | 3.17      |
| 11 | C:LYS 285[ N ]    | B:LEU 382[ O ]   | 3.30      |
| 12 | C:ARG 133[ O ]    | B:ARG 106[ NH1]  | 3.03      |
| 13 | C:GLU 127[ OE1]   | B:ARG 109[ NE ]  | 2.57      |
| 14 | C:TYR 330[ OH ]   | B:ARG 109[ NH1]  | 3.03      |
| 15 | C:ASP 328[ OD2]   | B:ARG 109[ NH1]  | 2.69      |
| 16 | C:GLU 127[ OE1]   | B:ARG 109[ NH2]  | 2.70      |
| 17 | C:SER 130[ OG ]   | B:ARG 109[ NH2]  | 3.56      |
| 18 | C:GLU 170[ OE1]   | B:ARG 110[ N ]   | 2.85      |
| 19 | C:GLU 170[ OE1]   | B:ARG 110[ NH1]  | 2.95      |
| 20 | C:GLU 170[ OE2]   | B:ARG 110[ NH1]  | 2.79      |
| 21 | C:GLU 230[ OE1]   | B:ARG 110[ NH2]  | 2.19      |
| 22 | C:ASP 166[ OD2]   | B:SER 112[ OG ]  | 2.56      |
| 23 | C:GLY 200[ O ]    | B:VAL 113[ N ]   | 2.63      |
| 24 | C:LEU 198[ O ]    | B:ALA 115[ N ]   | 2.85      |

|           |                 |                 |      |
|-----------|-----------------|-----------------|------|
| <b>25</b> | C:SER 212[ O ]  | B:ASN 258[ ND2] | 2.73 |
| <b>26</b> | C:LYS 213[ O ]  | B:ARG 262[ NE ] | 2.94 |
| <b>27</b> | C:GLY 214[ O ]  | B:ARG 262[ NH2] | 3.30 |
| <b>28</b> | C:ASN 283[ O ]  | B:LYS 285[ NZ ] | 2.70 |
| <b>29</b> | C:THR 278[ O ]  | B:ARG 381[ NE ] | 3.03 |
| <b>30</b> | C:THR 278[ OG1] | B:ARG 381[ NH2] | 2.98 |

## 5.2 Salt Bridge profile for C-subunit and CNBA + CNBB (108-416) of RIIB (PDB ID: 4X6Q)

| <b>##</b> | Catalytic Subunit | CNBA + CNBB<br>RIIB | Dist. [Å] |
|-----------|-------------------|---------------------|-----------|
| 1         | C:ARG 194[ NE ]   | B:ASP 288[ OD1]     | 3.12      |
| 2         | C:ARG 194[ NH1]   | B:ASP 288[ OD1]     | 3.60      |
| 3         | C:ARG 194[ NE ]   | B:ASP 288[ OD2]     | 3.14      |
| 4         | C:ARG 194[ NH1]   | B:ASP 288[ OD2]     | 2.48      |
| 5         | C:GLU 127[ OE1]   | B:ARG 109[ NE ]     | 2.57      |
| 6         | C:GLU 127[ OE2]   | B:ARG 109[ NE ]     | 3.55      |
| 7         | C:ASP 328[ OD2]   | B:ARG 109[ NH1]     | 2.69      |
| 8         | C:ASP 328[ OD2]   | B:ARG 109[ NH2]     | 3.03      |
| 9         | C:GLU 127[ OE1]   | B:ARG 109[ NH2]     | 2.70      |
| 10        | C:GLU 127[ OE2]   | B:ARG 109[ NH2]     | 3.91      |
| 11        | C:GLU 170[ OE1]   | B:ARG 110[ NH1]     | 2.95      |
| 12        | C:GLU 170[ OE2]   | B:ARG 110[ NH1]     | 2.79      |
| 13        | C:GLU 230[ OE2]   | B:ARG 110[ NH2]     | 2.88      |
| 14        | C:GLU 230[ OE1]   | B:ARG 110[ NH2]     | 2.19      |
